# Supplementary material for: Construction of 2D/2D Mesoporous WO3/CeO2 Laminated Heterojunctions for Optimized Photocatalytic Performance
Source: MDPI journal article supplement (doi:10.3390/nano13111798), 2023-06-04
Supplement: s1 [file s1]

# Construction of 2D/2D Mesoporous WO<sub>3</sub>/CeO<sub>2</sub> Laminated Heterojunctions Toward Optimized Photocatalytic Performance

Wenjie Wang<sup>#</sup>, Decai Yang<sup>#</sup>, Yifan Mou, Lijun Liao<sup>\*</sup>, Shijie Wang, Liping Guo,  
Xuepeng Wang, Zhenzi Li<sup>\*</sup>, Wei Zhou

Shandong Provincial Key Laboratory of Molecular Engineering, School of Chemistry and Chemical Engineering, Qilu University of Technology (Shandong Academy of Sciences), Jinan 250353, P. R. China

Email: lijun.liao@hotmail.com; zzli@qlu.edu.cn

W. Wang and D. Yang contributed equally to this work.

## S1.1 Chemicals

Sodium tungstate (Na<sub>2</sub>WO<sub>4</sub>·2H<sub>2</sub>O), Glucose (C<sub>6</sub>H<sub>12</sub>O<sub>6</sub>), acrylamide (C<sub>3</sub>H<sub>5</sub>NO), cerium nitrate (Ce(NO<sub>3</sub>)<sub>3</sub>·6H<sub>2</sub>O), and ammonia (NH<sub>3</sub>·H<sub>2</sub>O) were purchased from Aladdin Industrial Inc. Ethanol (EtOH), hydrochloric acid (HCl), citric acid (C<sub>6</sub>H<sub>8</sub>O<sub>7</sub>·H<sub>2</sub>O) and potassium hydroxide (KOH) were of analytical grade and purchased from Tianjin Kemiou Chemical Reagent Co., Ltd. All chemicals were utilized without additional treatment.

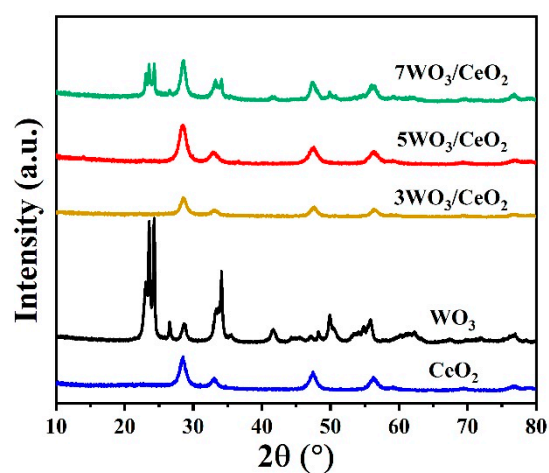

**Fig. S1.** XRD patterns of samples with different WO<sub>3</sub> contents.

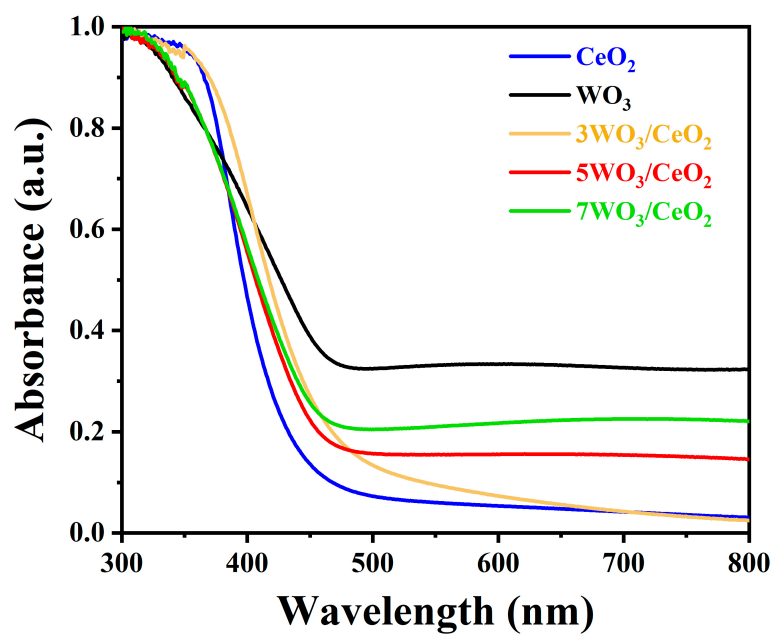

**Fig. S2.** UV-vis diffuse reflectance spectra of samples with different WO<sub>3</sub> contents.

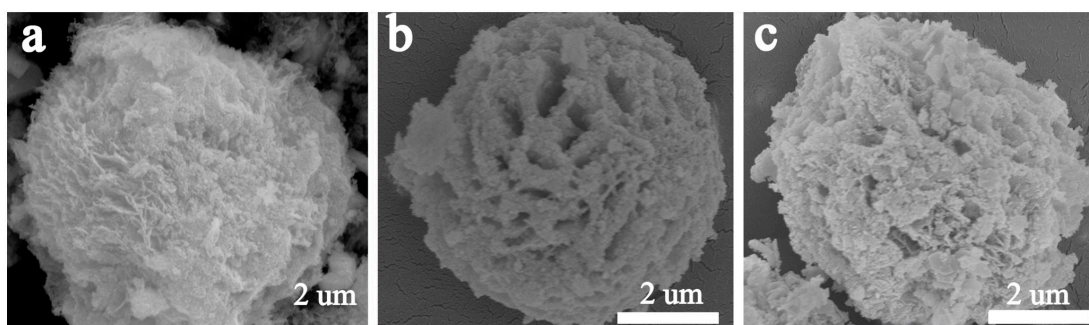

**Fig. S3.** Scanning electron microscope of samples with different  $\text{WO}_3$  contents. (a)  $3\text{WO}_3/\text{CeO}_2$ , (b)  $5\text{WO}_3/\text{CeO}_2$  and (c)  $7\text{WO}_3/\text{CeO}_2$ .

**Table S1.** The structure parameters of  $\text{WO}_3$ ,  $\text{CeO}_2$  and  $\text{WO}_3/\text{CeO}_2$ .

| Parameters                                      | $\text{WO}_3$ | $\text{CeO}_2$ | $\text{WO}_3/\text{CeO}_2$ |
|-------------------------------------------------|---------------|----------------|----------------------------|
| BET surface area ( $\text{m}^2 \text{g}^{-1}$ ) | 25            | 100.3          | 67.9                       |
| Pore size (nm)                                  | 46.5          | 9.3            | 9.56                       |
| Pore volume ( $\text{cm}^3 \text{g}^{-1}$ )     | 0.2           | 0.21           | 0.15                       |

Table S2. The total organic carbon (TOC) concentration before and after photocatalytic TC degradation.

| Catalysts                   | TOC concentration<br>before reaction ( $\text{mg L}^{-1}$ ) | TOC concentration<br>after reaction ( $\text{mg L}^{-1}$ ) |
|-----------------------------|-------------------------------------------------------------|------------------------------------------------------------|
| $\text{CeO}_2$              | 9.8                                                         | 1.6                                                        |
| $3\text{WO}_3/\text{CeO}_2$ | 10.3                                                        | 0.3                                                        |
| $5\text{WO}_3/\text{CeO}_2$ | 10.1                                                        | 0.1                                                        |
| $7\text{WO}_3/\text{CeO}_2$ | 9.9                                                         | 0.3                                                        |
